# Supplementary material
Source: PubMed Central journal article supplement (PMC6638691)
Supplement: MPP-15-601-s001.pdf [file MPP-15-601-s001.pdf]

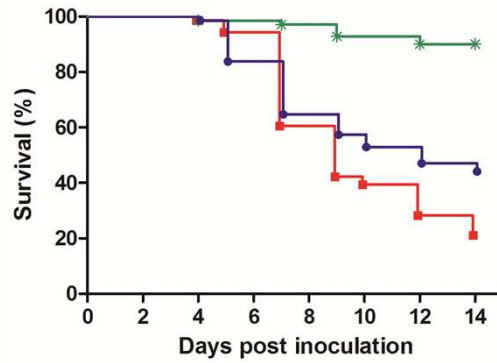

|                               | WT      | <i>hpaP</i> |
|-------------------------------|---------|-------------|
| <i>hpaP</i>                   | <0.0001 | -           |
| <i>hpaP::hpaP<sup>+</sup></i> | 0.1671  | <0.0001     |

## Supplementary Fig. S1

**The *hpaP* mutant is strongly reduced in virulence on tomato.** Kaplan-Meier survival analysis of tomato plants inoculated with *Ralstonia solanacearum* wild-type strain (red squares), *hpaP* mutant (green stars) and the complemented strain *hpaP::hpaP<sup>+</sup>* (blue circles). Each strain was root inoculated on 24 tomato plants. *P*-value from Gehan-Breslow-Wilcoxon tests are shown below the graph. Red boxes indicate *P*-values of <0.01. Data were pooled from three independent experiments.
