# Supplementary material
Source: PubMed Central journal article supplement (PMC6638691)
Supplement: MPP-15-601-s002.pdf [file MPP-15-601-s002.pdf]

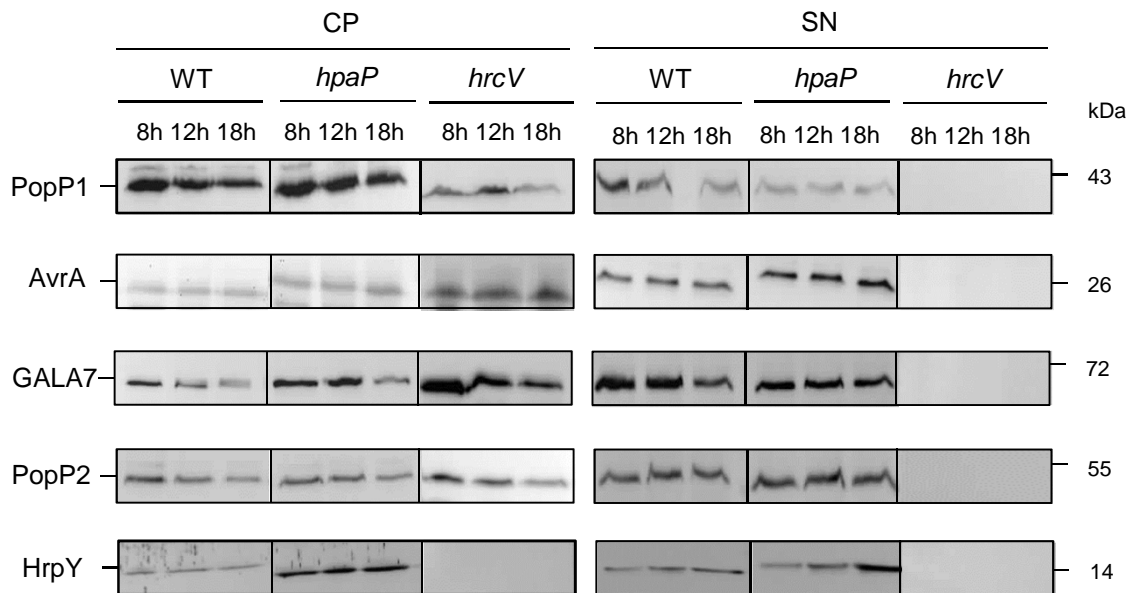

## Supplementary Fig. S2

**HpaP modulates the secretion of AvrA and PopP1.** *Ralstonia solanacearum* wild-type strain (WT), *hpaP* and *hrcV* mutants were cultivated in secretion medium, cell pellets (CP) and culture supernatants (SN) were harvested after 8, 12 and 18 hours of culture and analyzed by immunoblotting. Effector proteins PopP1 (43 kDa), AvrA (26 kDa), PopP2 (53 kDa), GALA7 (68 kDa) and type three secretion system pilin HrpY (14 kDa) were detected using their respective antibodies. T3Es and HrpY were visualized in the CP and not in the SN of *hrcV* mutant (a type three secretion system defective mutant). Three independent biological replicates were made. Statistical analysis (ANOVA) presented in Fig. 5 revealed that AvrA and PopP1 were similarly produced (CP) but respectively more ( $P$ -value = 0.026) and less ( $P$ -value = 0.004) secreted (SN) for the *hpaP* mutant compared to the wild-type strain. Pilin HrpY was significantly more abundant in CP ( $P$ -value =  $10^{-4}$ ) and SN ( $P$ -value = 0.009) for the *hpaP* mutant compared to the wild-type strain. Western blots of one representative experiment are presented here.
