# Supplementary material
Source: PubMed Central journal article supplement (PMC6638691)
Supplement: MPP-15-601-s004.pdf [file MPP-15-601-s004.pdf]

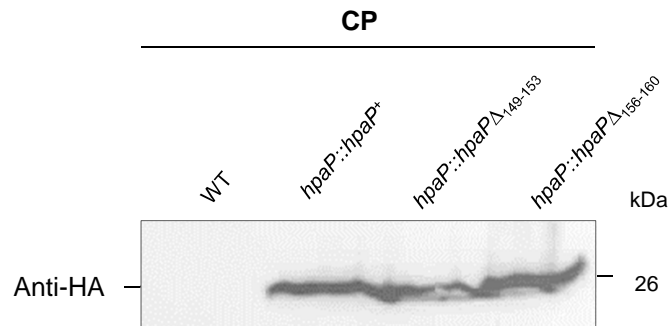

### Supplementary Fig. S4

**Control of the production of the HpaP wild-type protein and of two HpaP deletion derivatives (HpaP $\Delta$ <sub>149-153</sub> and HpaP $\Delta$ <sub>156-160</sub>).** *Ralstonia solanacearum* wild-type strain (WT) and *hpaP* mutants expressing the *hpaP* wild-type version (*hpaP*<sup>+</sup>) or *hpaP* derivatives (*hpaP* $\Delta$ <sub>149-153</sub> and *hpaP* $\Delta$ <sub>156-160</sub>) were cultivated in secretion medium for 8 hours. Cell pellet (CP) extracts were harvested and HpaP proteins (26 kDa) were detected by immunoblotting using anti-hemagglutinin (anti-HA) antibody.
